# Supplementary material for: Bronchoscopic light delivery method for peripheral lung cancer photodynamic therapy
Source: PubMed Central journal article supplement — J Thorac Dis. 2020 Jul;12(7):3611–21. doi: 10.21037/jtd-19-3887 (PMC7399407; doi:10.21037/jtd-19-3887), 2020-07
Supplement: jtd-12-07-3611-dss.pdf [file jtd-12-07-3611-dss.pdf]

## Data Sharing Statement

|                     |                                                                                                                                                    |                                                                                 |
|---------------------|----------------------------------------------------------------------------------------------------------------------------------------------------|---------------------------------------------------------------------------------|
| <b>Article Info</b> | Article information: <a href="http://dx.doi.org/10.21037/jtd-19-3887">http://dx.doi.org/10.21037/jtd-19-3887</a> .                                 |                                                                                 |
| <b>Item</b>         | <b>Question</b>                                                                                                                                    | <b>Authors' Response<br/>(place "-" if not applicable)</b>                      |
| 1                   | Would you like to share data collected for your study to others?                                                                                   | Yes                                                                             |
| 2                   | If not, would you like to share the reason for your decision?                                                                                      | -                                                                               |
| 3                   | What data in particular will be shared?                                                                                                            | I would like to share all the experiment raw data                               |
| 4                   | Any other documents will be share? Such as study protocol, statistical analysis plan, informed consent form, clinical study report, analytic code. | Yes, I would like to share                                                      |
| 5                   | When will data availability begin?                                                                                                                 | After the paper published                                                       |
| 6                   | When will data availability end?                                                                                                                   | Permanent if needed                                                             |
| 7                   | To whom will you share the data?                                                                                                                   | To whom have interests in this study                                            |
| 8                   | For what type of analysis or purpose?                                                                                                              | -                                                                               |
| 9                   | How or where can the data/documents be obtained?                                                                                                   | The readers can email to the corresponding author for asking the data/documents |
| 10                  | Any other restrictions?                                                                                                                            | No                                                                              |
